# Supplementary material for: Drosophila Neurotrophins Reveal a Common Mechanism for Nervous System Formation
Source: PLoS Biol. 2008 Nov 18;6(11):e284. doi: 10.1371/journal.pbio.0060284 (PMC2586362; doi:10.1371/journal.pbio.0060284)
Supplement: Table S2 — (48 KB DOC) [file pbio.0060284.st002.doc]

# Table S2 A NT superfamily Cysknot is present in DNT1/Spz2, Spz and DNT2/Spz5

**Abbreviations**: CI-CVI: Cysteines I to VI within the Cysknot. CI-CVI =NTs: canonical vertebrate NT Cysknot with conserved Cysteines. +1 = Sk-NT: extra Cysteine like in acorn worm NT (see below §); ≠ from all NTs: these Cysknots differ from the canonical NT Cysknot. *** FUGUE scores:** the threshold value is 6, above which structural similarity to a protein of known structure (i.e. inferred from crystals) is with 99% confidence. Fugue score = 6 reveals similarity with 95% confidence. Scores below 6 indicate no significant structural homology. Thus FUGUE revelas a closer similarity of DNT1 to NTs than to Coagulogen. Previous analysis by Mizuguchi et al (1998) and Parker et al (2001) did not employ FUGUE.

**§ Cysknot features:** DNT1, Spz, Spz5 and Sk-NT (as well as Spz3 and Spz4) have, as well as the canonical 6 Cysteines from vertebrate NTs, a seventh Cysteine prior to the canonical 5th Cys. This 7th Cys is thought to stabilise the Cysknot dimers. Spz5 has an extra Cys. The number and distribution of Cysteines in Spz3, 4 and 6 differ from the canonical NT Cysknot. The Cysknot in Spz6 is very different form the canonical NT Cysknot.

| **Spz paralogue** | **FUGUE score***  **vs h-NTs**  **>6= 99%C** | **Conserved**  **Cysteines**  **as in NT Cysknot §** | **Cysknot SIZE**  **NT=106 aa** | **% Identity** | **EXPRESSION**  **& Function** | **REFERENCES** |
| --- | --- | --- | --- | --- | --- | --- |
| **DNT1/Spz2** | 7.38 vs  NTs  3.77 vs Coagulogen | **CI-CVI = NTs**  **+1C before CV = Sk-NT** | 102 aa | 26 % to  BDNF | Expressed at all stages;  NT function | This work;  Parker et al (2001) Proteins 45, 71-80 |
| **Spz** | **7.16** | **CI-CVI = NTs**  **+1C = Sk-NT** | 106 aa | 19% to  NGF | Expressed at least in embryo;  NT function | This work;  Parker et al (2001) Proteins;  DeLotto&DeLotto (1998) MOD 72;  Mizuguchi et al (1998) TIBS 23 |
| **Spz3** | 5.4 | CI-CVI = NTs  +2 C  ≠ from all NTs | 100 aa | 51% to Spz4 | Not known;  possibly like spz4? | This work;  Parker et al (2001) Proteins  45, 71-80 |
| **Spz4** | 6.79 | CI-CVI = NTs  +2 C  ≠ from all NTs | 97 aa  lacks conserved intron | 29% to Coagulogen  51% to Spz3 | Larva, adult.  Expression  Increases upon immune challenge | This work;  Parker et al (2001) Proteins 45, 71-80 |
| **DNT2/Spz5** | **7.63** | **CI-CVI = NTs**  **+1C = Sk-NT**  **+1C** | 102 aa | 26% to Spz in Cysknot | Expressed at least in embryo;  NT function | This work;  Parker et al (2001) Proteins 45, 71-80 |
| **Spz6** | 2.49 | No CIV  No +1C  + 3C extra  at different positions  ≠ from all NTs | 152 aa  85 aa between CIII and CV differ  lacks conserved intron | diverged | Expressed in embryo, larvae, CNS, PNS | This work;  Parker et al (2001) Proteins 45, 71-80 |
