# Supplementary material for: Drosophila Neurotrophins Reveal a Common Mechanism for Nervous System Formation
Source: PLoS Biol. 2008 Nov 18;6(11):e284. doi: 10.1371/journal.pbio.0060284 (PMC2586362; doi:10.1371/journal.pbio.0060284)
Supplement: Table S3 — (28 KB DOC) [file pbio.0060284.st003.doc]

TABLES S3

Synergistic interactions between mutations in *DNT1, DNT2* and *spz*

| **GENE & ALLELE** | **MOLECULAR**  **LESION** | **GENOTYPE** | **LETHALITY** | LOCOMOTION **DEFICITS**  **See films** |
| --- | --- | --- | --- | --- |
| **DNT1** | null | DNT141/DNT141 | Viable & fertile | Not apparent. |
| **DNT1** | null | DNT141/TM6B | Viability of DNT1-/- compromised. |  |
| **DNT2** | PBac insertion into intron | DNT2 e03444/  DNT2 e03444 | Viable and fertile | Not apparent |
| **spz** | EMS induced mutation in pro-domain | spz2/TM6B | Homozygous **semi-lethal**  7.12% escapers (n= 407) | **Homozygous mutant flies have severe locomotion deficit.**  **100% penetrance** |
| **spz** | EMS-induced mutation in Cysknot domain | spz3/TM6B | Homozygous lethal | N/A |
| **DNT1 DNT2** | Double mutant | DNT141 DNT2 e03444 /TM6B | Homozygous lethal at 18°C  Is it due to competition? | N/A |
| **DNT1 DNT2** | Double mutant | DNT141 DNT2e03444/ DNT141 DNT2 e03444 | Homozygous viable also at 18°C, some larval lethality | **Locomotion deficits**  **Severe: 41% n=17**  **Mild: 11.7%** |
| **DNT1 DNT2** | Double mutant | DNT141 Df6092 /TM6B | Homozygous lethal | N/A |
| **DNT1 DNT2** | Double mutant | DNT141 DNT2 e03444 /DNT141 Df6092 | **Some larval lethality** | **Locomotion deficits**  **Severe: 3.3% n=30**  **Mild: 10%** |
| **DNT1 spz** | Double mutant | DNT141 spz2 / DNT141 spz2 | **Homozygous lethal** | N/A |
| **DNT1DNT2 spz** | Triple mutant | DNT141 DNT2 e03444 spz2/  DNT141 DNT2 e03444 spz2 | **Homozygous lethal** | N/A |
| **DNT1DNT2 spz/**  **DNT1 DNT2** | Triple mutant in trans over double | DNT141 DNT2 e03444 spz2/  DNT141 DNT2 e03444 | ? | ? |
